# Supplementary figures and images for: Effect of hydrogel material composition on hBMSC differentiation into zone-specific neo-cartilage: engineering human articular cartilage-like tissue with spatially varying properties
Source: Royal Society of Chemistry journal article supplement (doi:10.1039/c7tb00896a), 2017-01-01

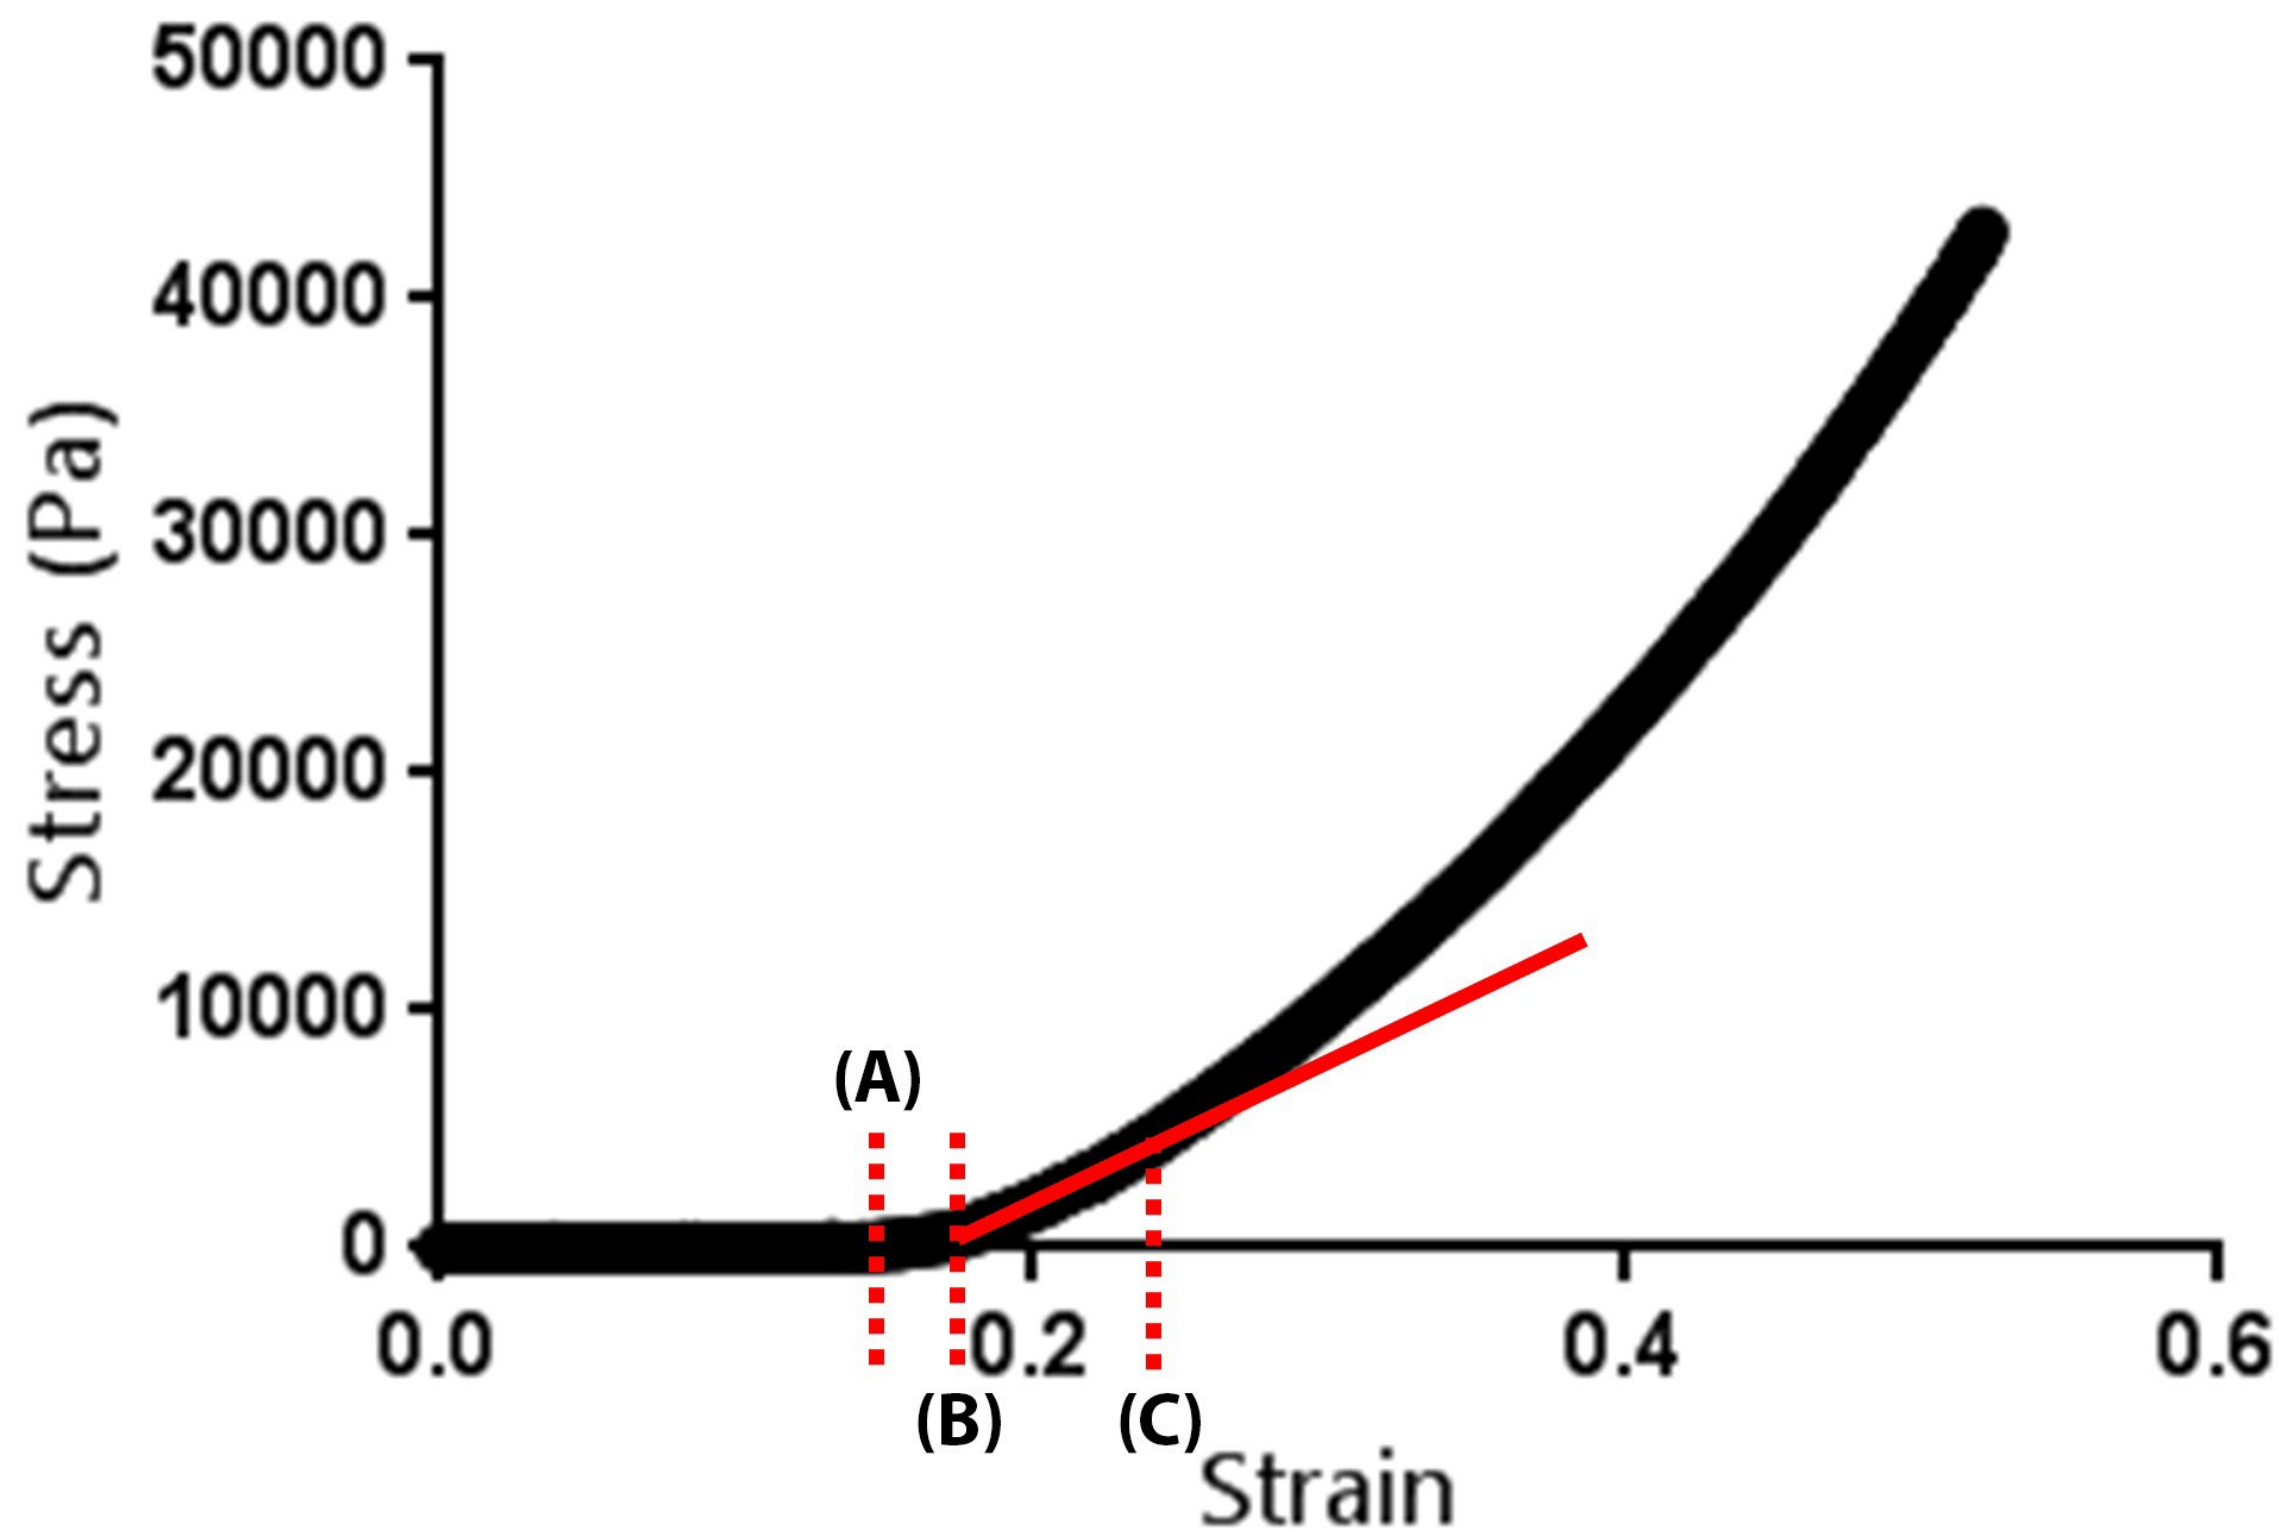

Supplement: c7tb00896a2.pdf [file c7tb00896a2.pdf]

**Cartilage**

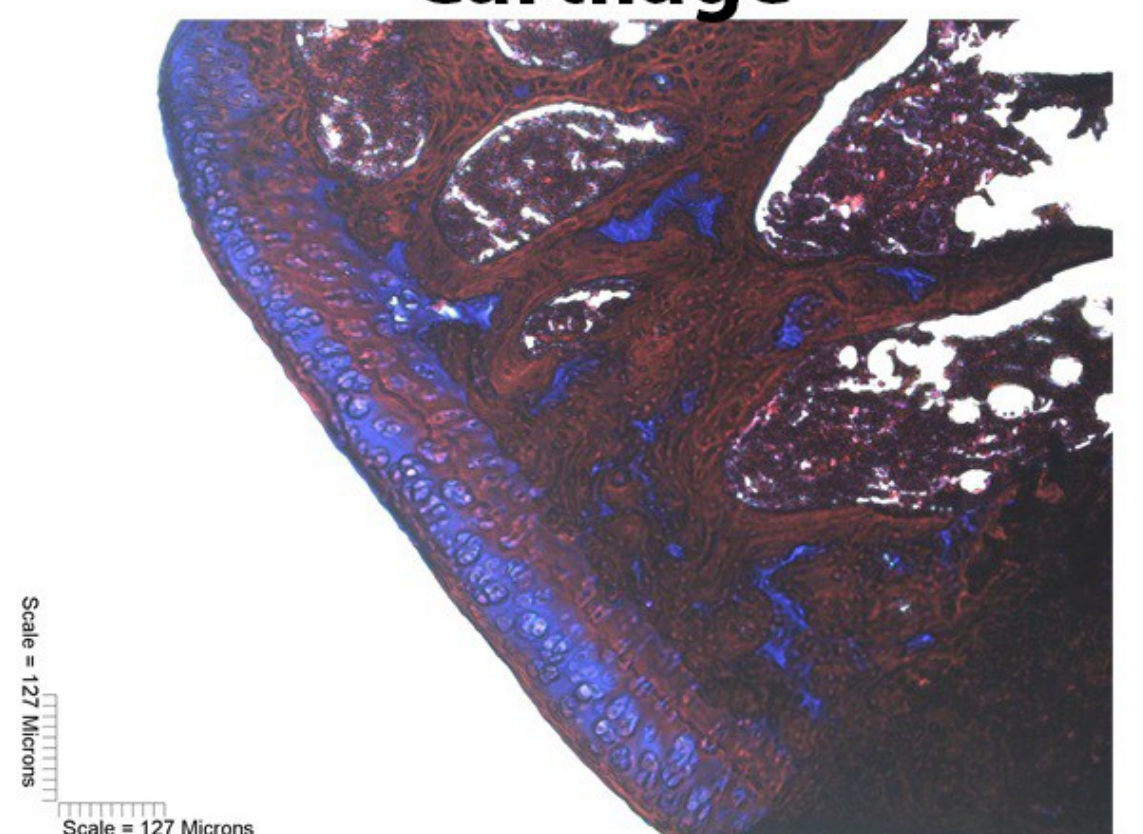

**Pellet**

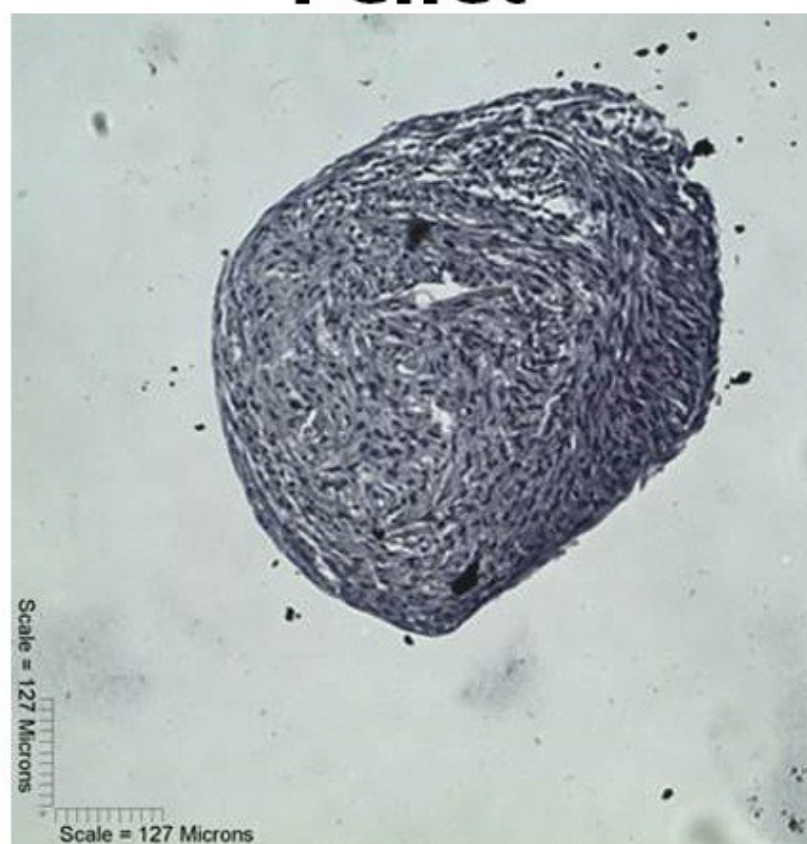

Supplement: c7tb00896a5.pdf [file c7tb00896a5.pdf]
